# Supplementary material
Source: MDPI journal article supplement (https://www.mdpi.com/2311-7524/10/5/512)
Supplement: s1 [file s1]

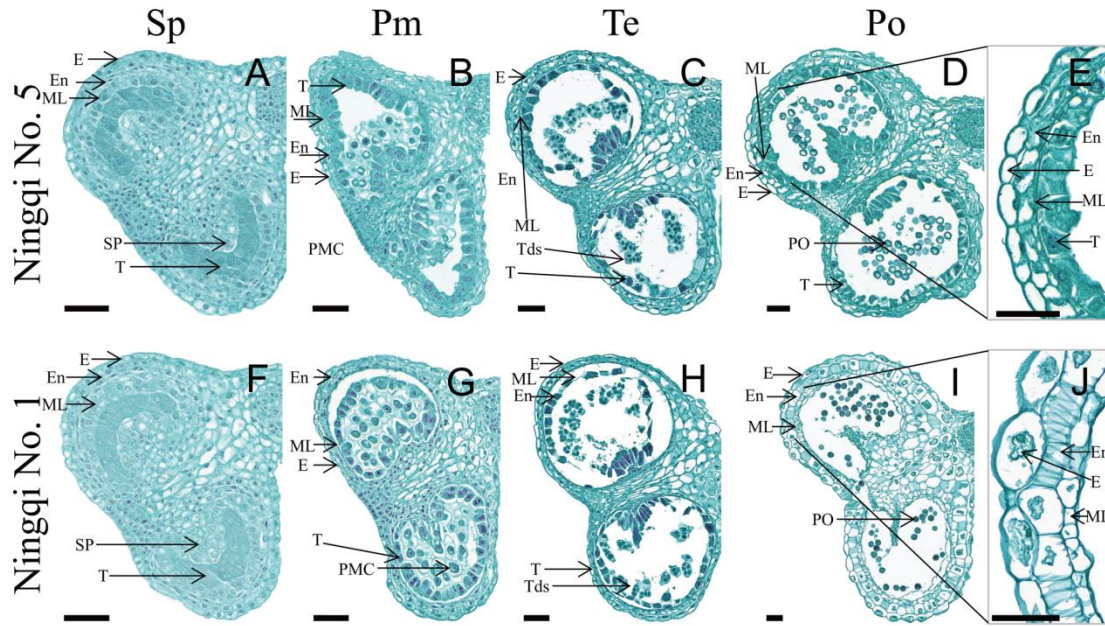

**Figure S1.** Paraffin sections of Ningqi No. 5 and Ningqi No. 1 pollen sacs at different development stages. A–E. pollen sac development of Ningqi No. 5; F–J. pollen sac development of Ningqi No. 1; (A,F), pollen sacs of Sp stage; (B,G), pollen sacs at Pm stage; (C,H), pollen sacs at Te stage; (D,I), pollen sacs at Po stage; (E,J), anther wall layers at Po stage. E, epidermis; EN, endothecium; ML, middle layer; T, tapetum; Tds, tetrad; PMC, pollen mother cell; SP, sporogenous cell; Po, pollen grain. Scale bar = 50  $\mu$ m.

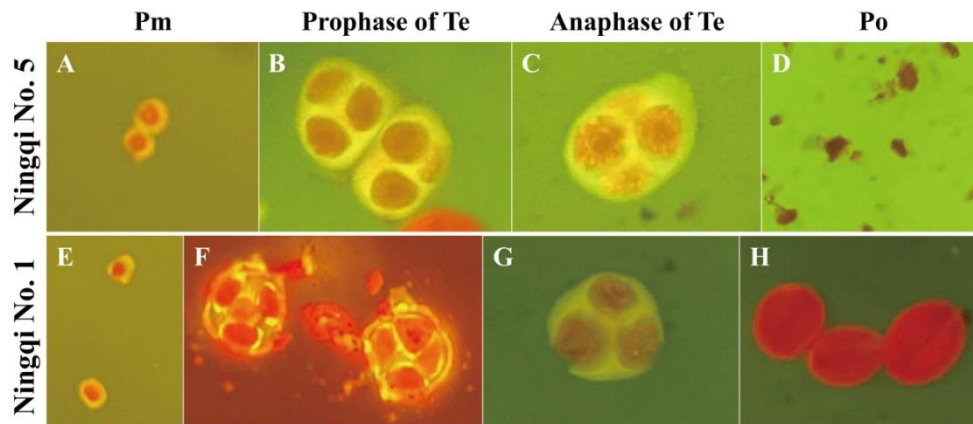

**Figure S2.** Callose development in Ningqi No.5 and Ningqi No.1 at different development stages: red is nuclear material, yellow is callose. (A,E), There was no significant change in callose in Pm stage in Ningqi No.1 and Ningqi No.5; B, There are clearly visible tetrads in the pollen sac cavity and thin callose outside the tetrads at prophase of Te stage in Ningqi No.5; C, Callose is not degraded at anaphase of Te stage in Ningqi No.5; D, At the Po stage, no microspore was found in Ningqi No.5; F, There are clearly visible tetrads in the pollen sac, and the callose wall around the tetrads is thick at prophase of Te stage in Ningqi No.1; G, Callose began degradation and becomes thin at anaphase of Te stage in Ningqi No.1; H, At the Po stage, round and deeply colored microspores can be seen in Ningqi No.1.

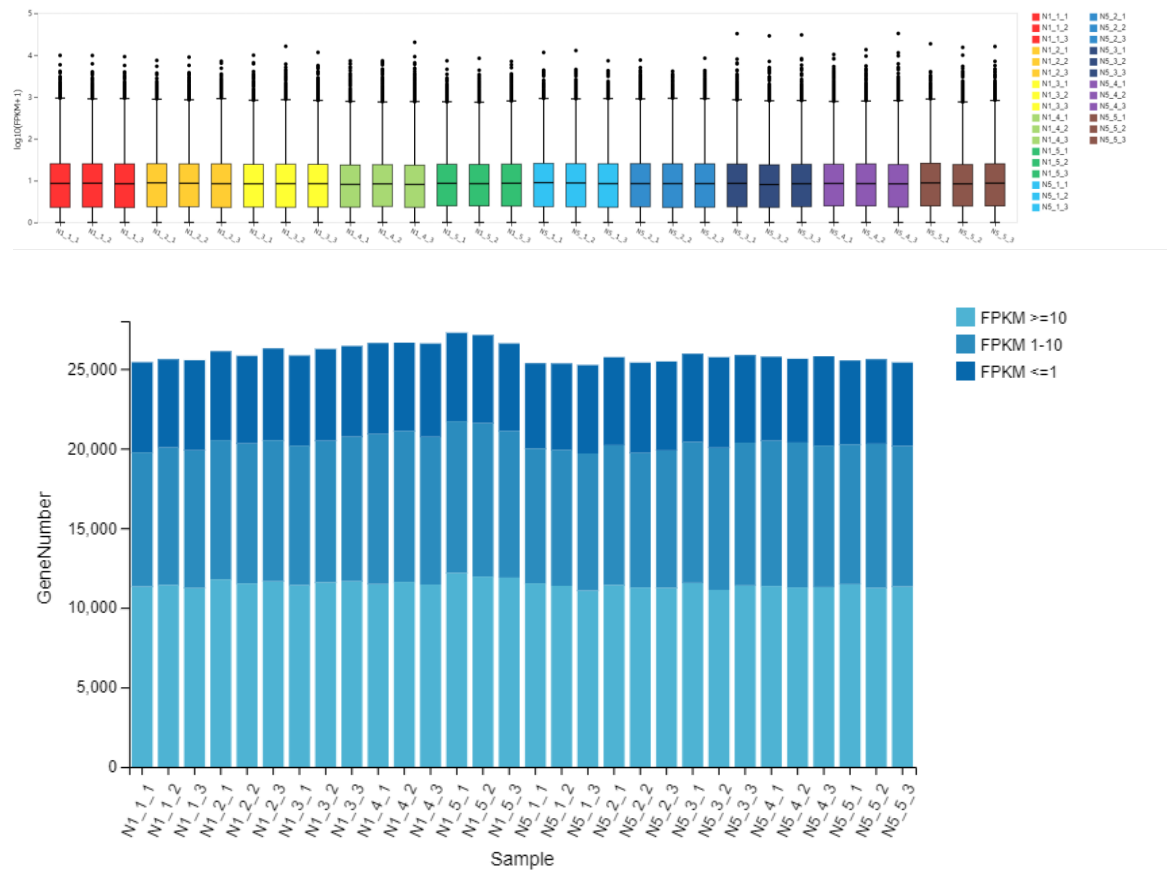

**Figure S3.** Gene expression levels and number of expression genes. **(A)** Box-plot of all gene expression levels base on FPKM, y-axis is  $\log_{10}(\text{FPKM}+1)$ , x-axis represent different samples; **(B)** Bar-plot of number of expressed genes in each sample, y-axis is gene number, x-axis represent different samples, the diminishing gray shows different expressed levels based on FPKM.

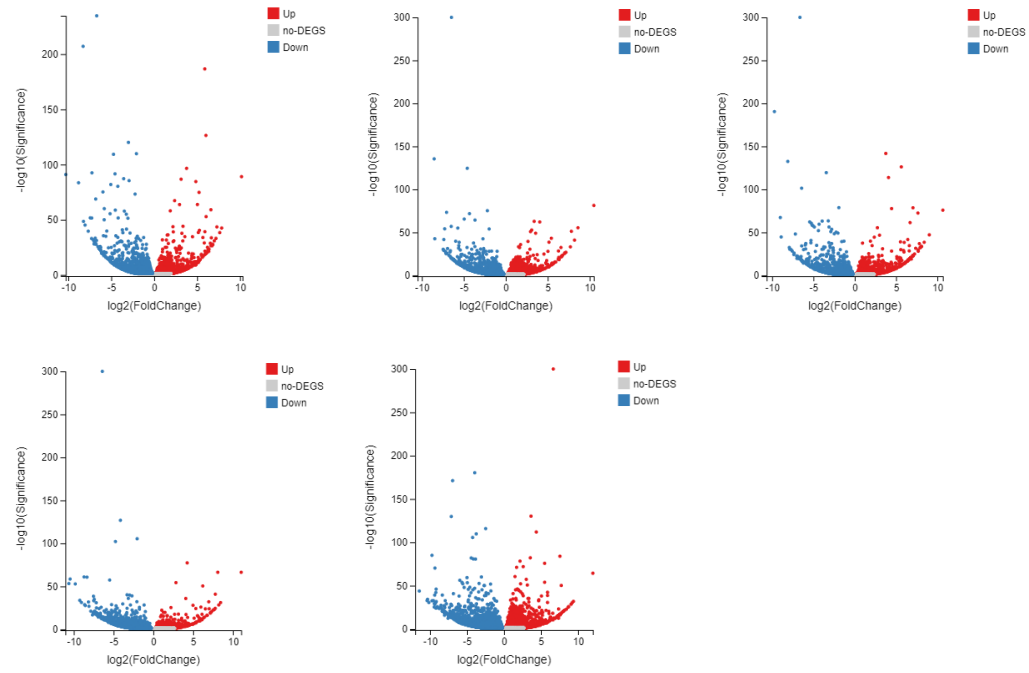

**Figure S4.** Volcano plots of all time points' DEGs. **(A)** Ar. **(B)** Sp. **(C)** Pm. **(D)** Te. **(E)** Po. **(F)** 4:00. X-axis is  $\log_2$  (fold change), Y-axis is  $-\log_{10}$  (Significance), blue point means fold change of differential expression higher than 1 and Significance lower than 0.05.

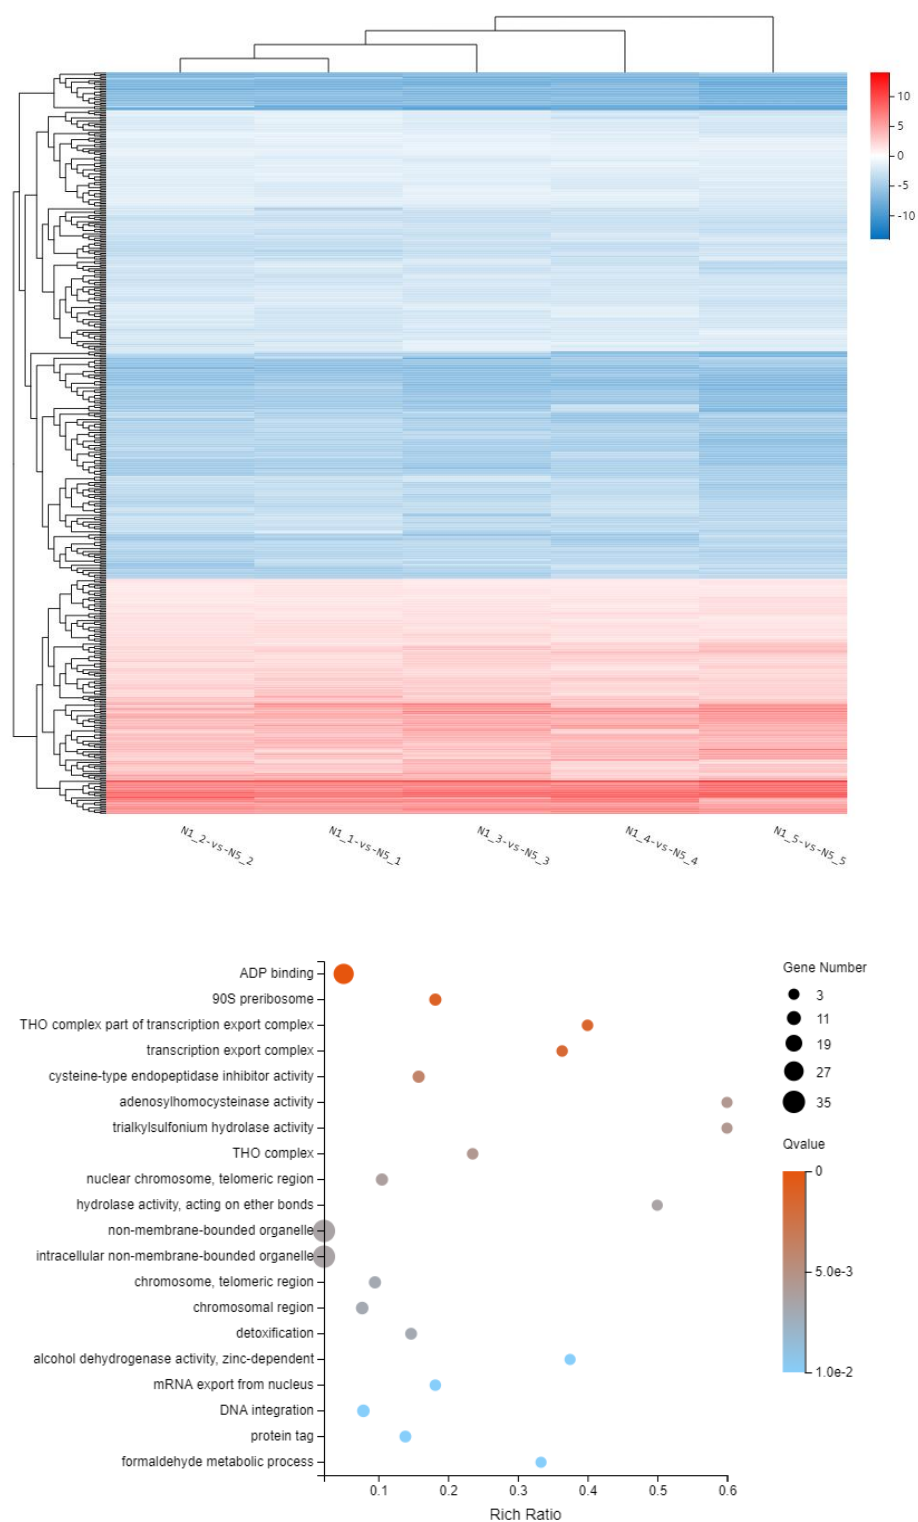

**Figure S5.** DEGs of all control groups. (A) heatmap of 489 DEGs in anther; each row corresponds to a gene, each column corresponds to control group, the color of every cell indicates the expression level based on z-score normalization. (B) significant GO enrichment of 489 DEGs; X-axis is rich ratio and different GO terms is in Y-axis.

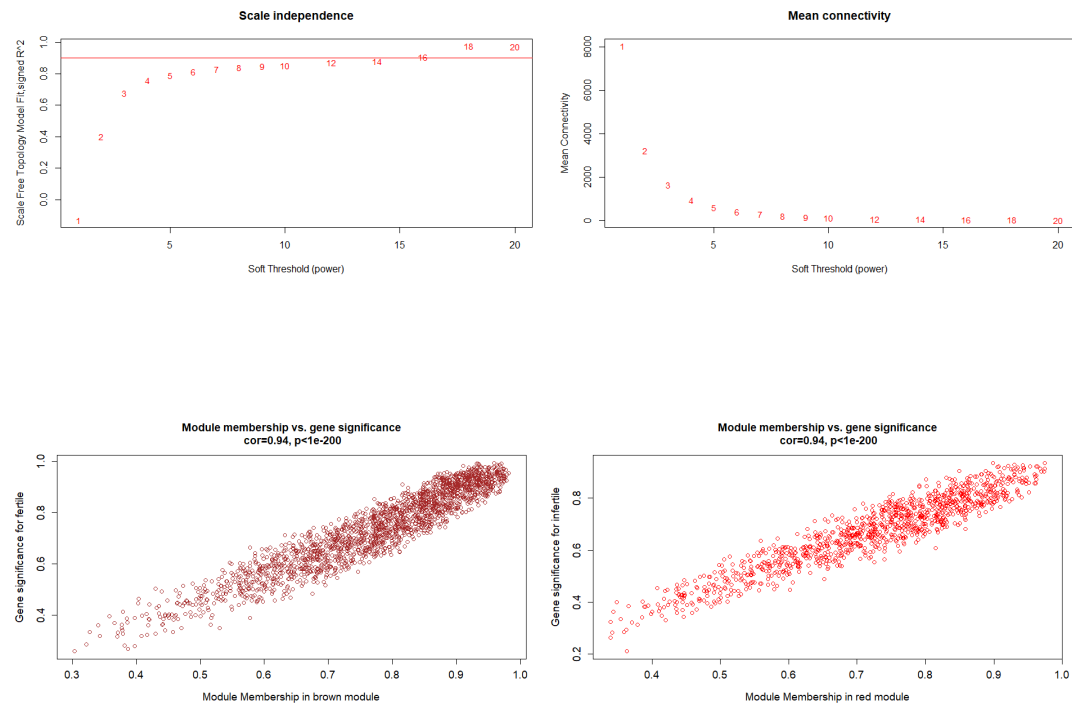

**Figure S6. (A)** The network topology for various soft thresholding powers. The left panel shows the scale-free fit index (y-axis) as a function of the soft-thresholding power(x-axis). The right panel displays the mean connectivity (degree, y-axis) as a function of the soft-thresholding power(x-axis); **(B)** The relationship between genes in module and the representative traits of the module. The left panel shows gene significance for fertile. The right panel displays gene significance for infertile.

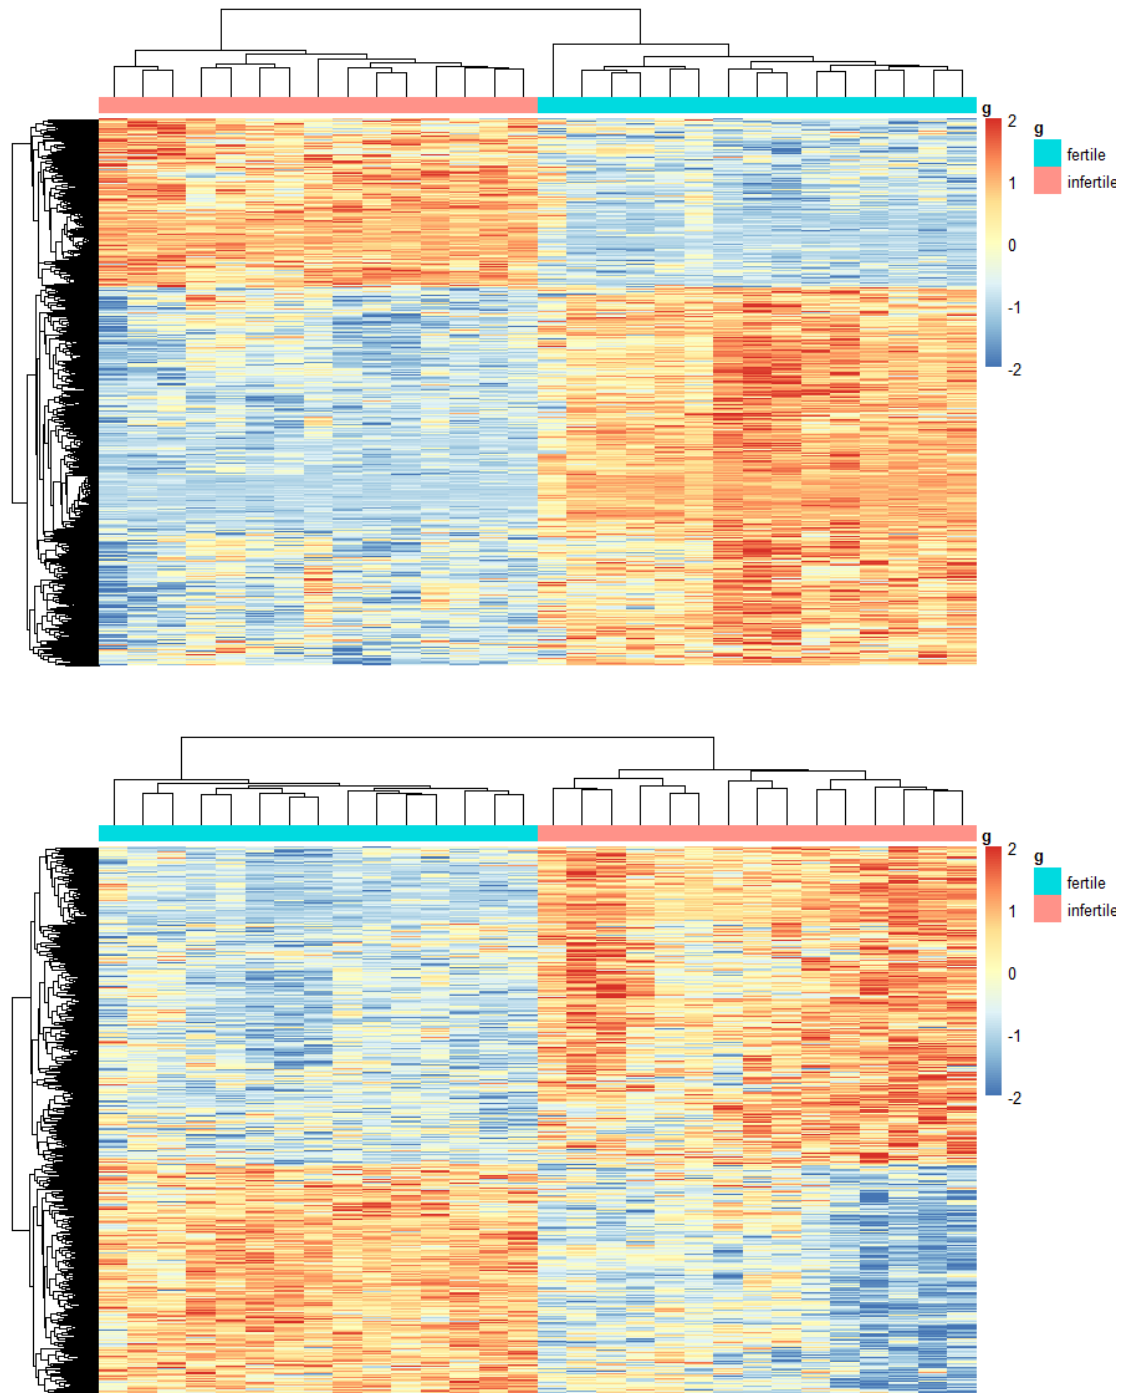

**Figure S7.** The expression of genes in the MEbrown and MERed modules in different samples. (A) MEbrown; (B) MERed.

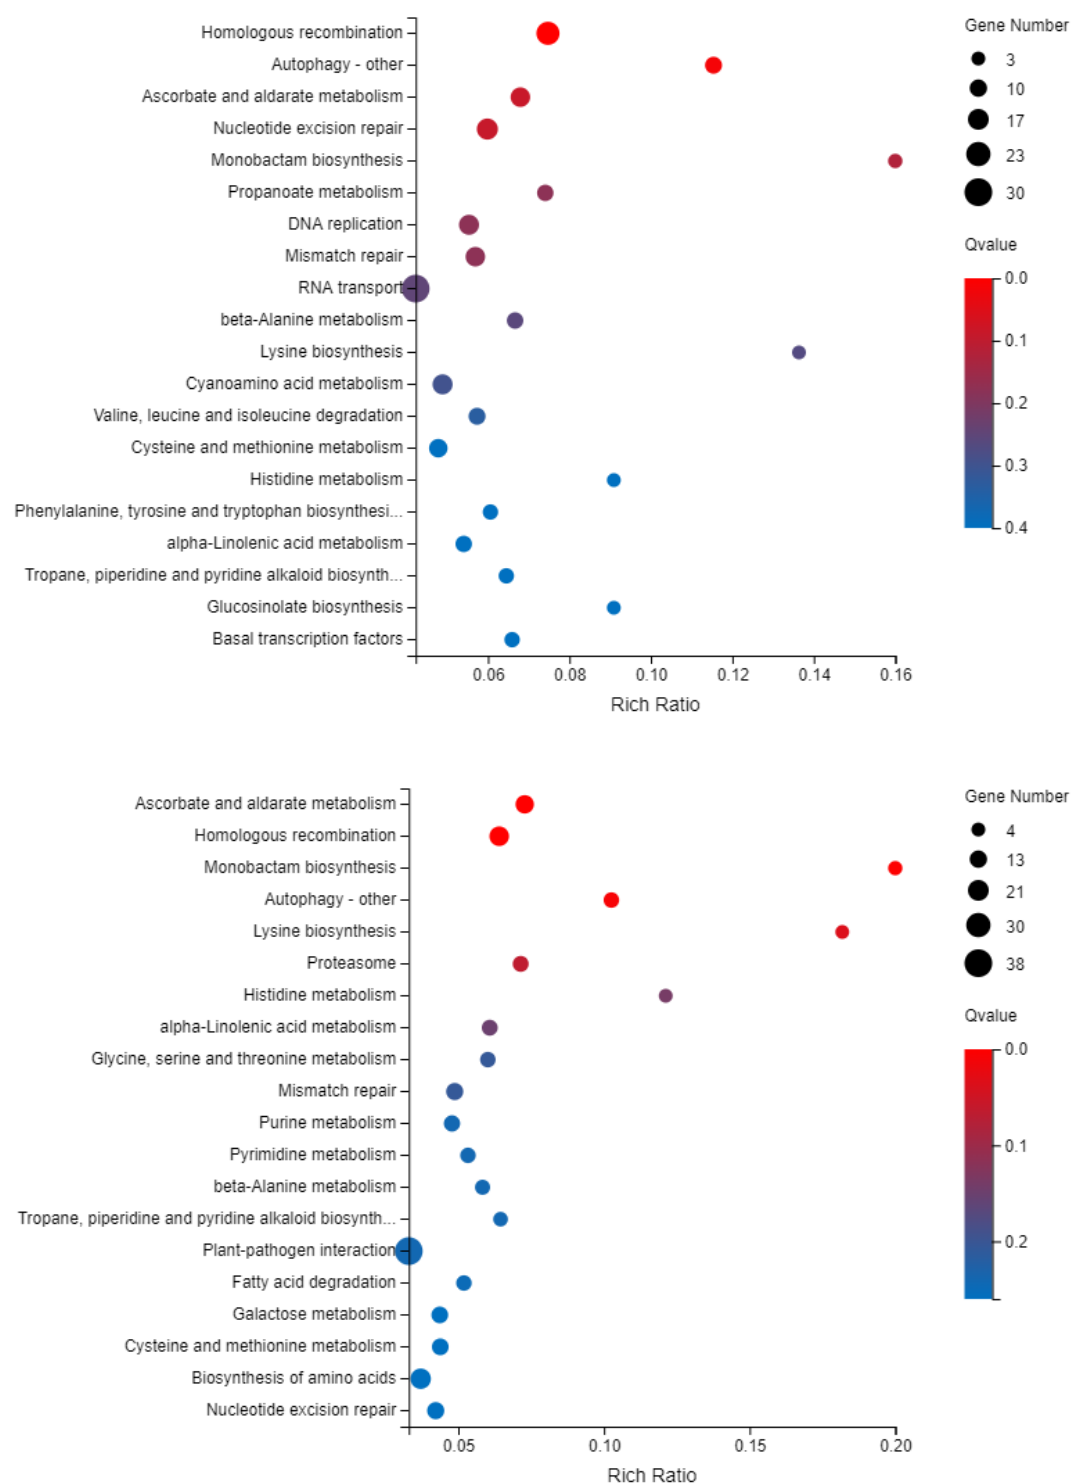

**Figure S8.** KEGG enrichment bubble map of genes in MEbrown and MERed Modules. **(A)** MEbrown; **(B)** MERed.

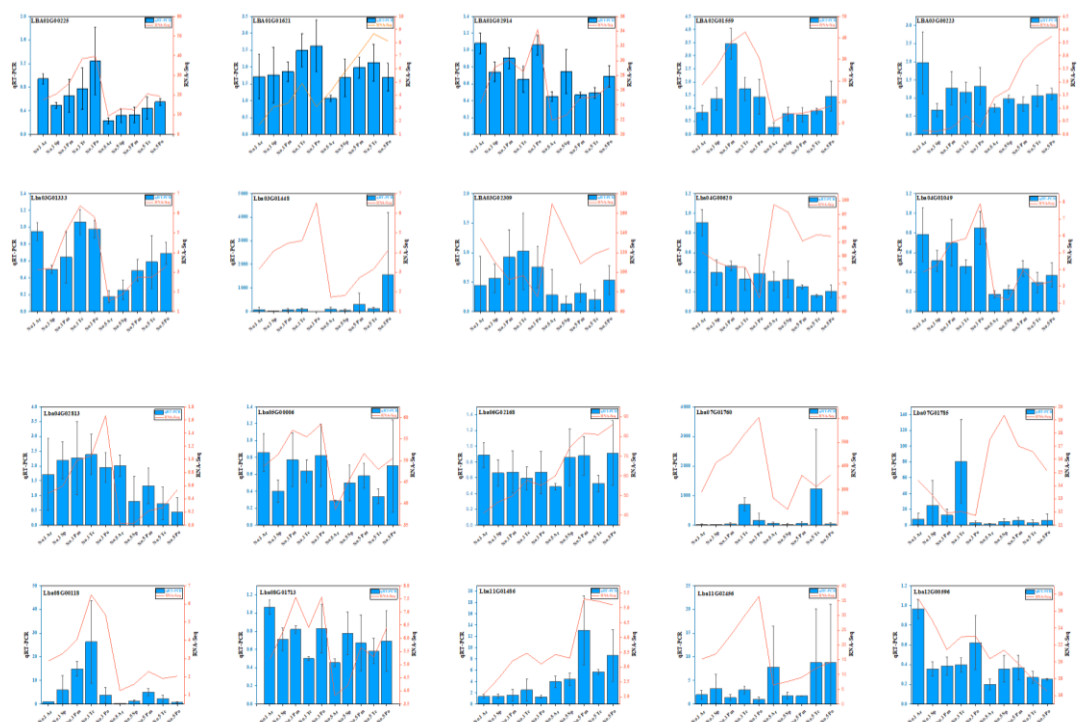

**Figure S9.** Verification of qRT-PCR expression of some genes.
